# Supplementary material for: Widespread occurrence of covalent lysine–cysteine redox switches in proteins
Source: PubMed Central journal article supplement (PMC8964421; doi:10.1038/s41589-021-00966-5), 2022-02-14
Supplement: 41589_2021_966_MOESM1_ESM.pdf [file 41589_2021_966_MOESM1_ESM.pdf]

---

**Supplementary information**

---

**Widespread occurrence of covalent lysine–cysteine redox switches in proteins**

---

In the format provided by the authors and unedited

# Supplementary Information

## **Widespread occurrence of covalent lysine–cysteine redox switches in proteins**

Fabian Rabe von Pappenheim <sup>1,2</sup>, Marie Wensien <sup>1,2</sup>, Jin Ye <sup>3</sup>, Jon Uranga <sup>3</sup>, Iker Irisarri <sup>4,5</sup>,  
Jan de Vries <sup>4,5</sup>, Lisa-Marie Funk <sup>1,2</sup>, Ricardo A. Mata <sup>3</sup>, & Kai Tittmann <sup>1,2</sup> \*

<sup>1</sup> Department of Molecular Enzymology, Göttingen Center of Molecular Biosciences, Georg-August University Göttingen, Julia-Lermontowa-Weg 3, D-37077 Göttingen, Germany

<sup>2</sup> Department of Structural Dynamics, Max-Planck-Institute for Biophysical Chemistry, Am Fassberg 11, D-37077 Göttingen, Germany

<sup>3</sup> Institute of Physical Chemistry, Georg-August University Göttingen, Tammannstraße 6, D-37077 Göttingen, Germany

<sup>4</sup> Institute for Microbiology and Genetics & Göttingen Center of Molecular Biosciences, Georg-August University Göttingen, Goldschmidtstrasse 1, D-37077 Göttingen, Germany;

<sup>5</sup> Campus Institute Data Science, Georg-August University Göttingen

\* To whom correspondence shall be addressed: [ktittma@gwdg.de](mailto:ktittma@gwdg.de) (K.T.)

# Supplementary Data

## **Supplementary Data 1 (caption)**

Excel-based data table listing all pdb entries (resolution  $\leq 2.0 \text{ \AA}$ ) with close contacts between cysteine and lysine sidechains ( $N_{\text{Lys}} - S_{\text{Cys}}$  interatomic distance  $< 3 \text{ \AA}$ ). The table contains the corresponding pdb entry, resolution, sequence positions of the lysine and cysteine residues, protein name and source (organism), cellular localisation as well as identification and classification of NOS and/or SONOS crosslinks.

# Supplementary Figures

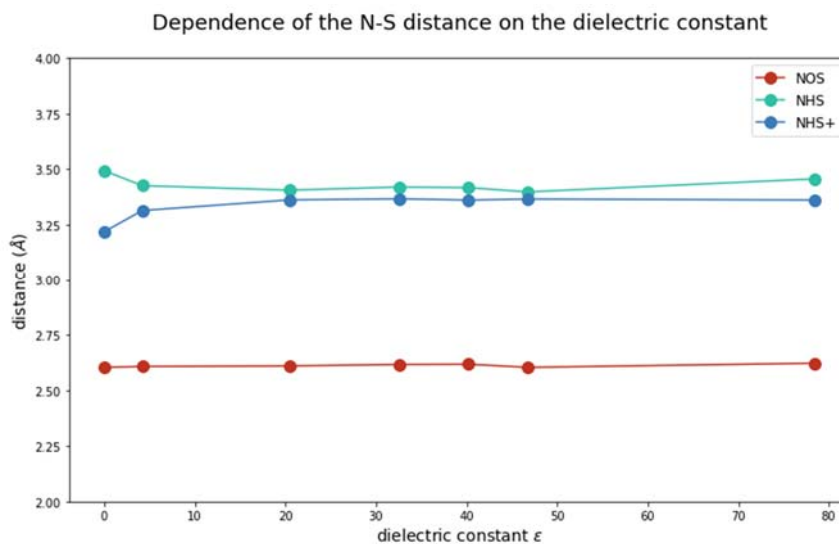

**Supplementary Fig. 1.** Dependence of the N-S distance on the dielectric constant for the three model situations of Lys-Cys binding. The calculations were carried out for a single sampled conformer at the B3LYP-D3(BJ)/def2-SVP level of theory applying different dielectric constants with the use of the SMD module.

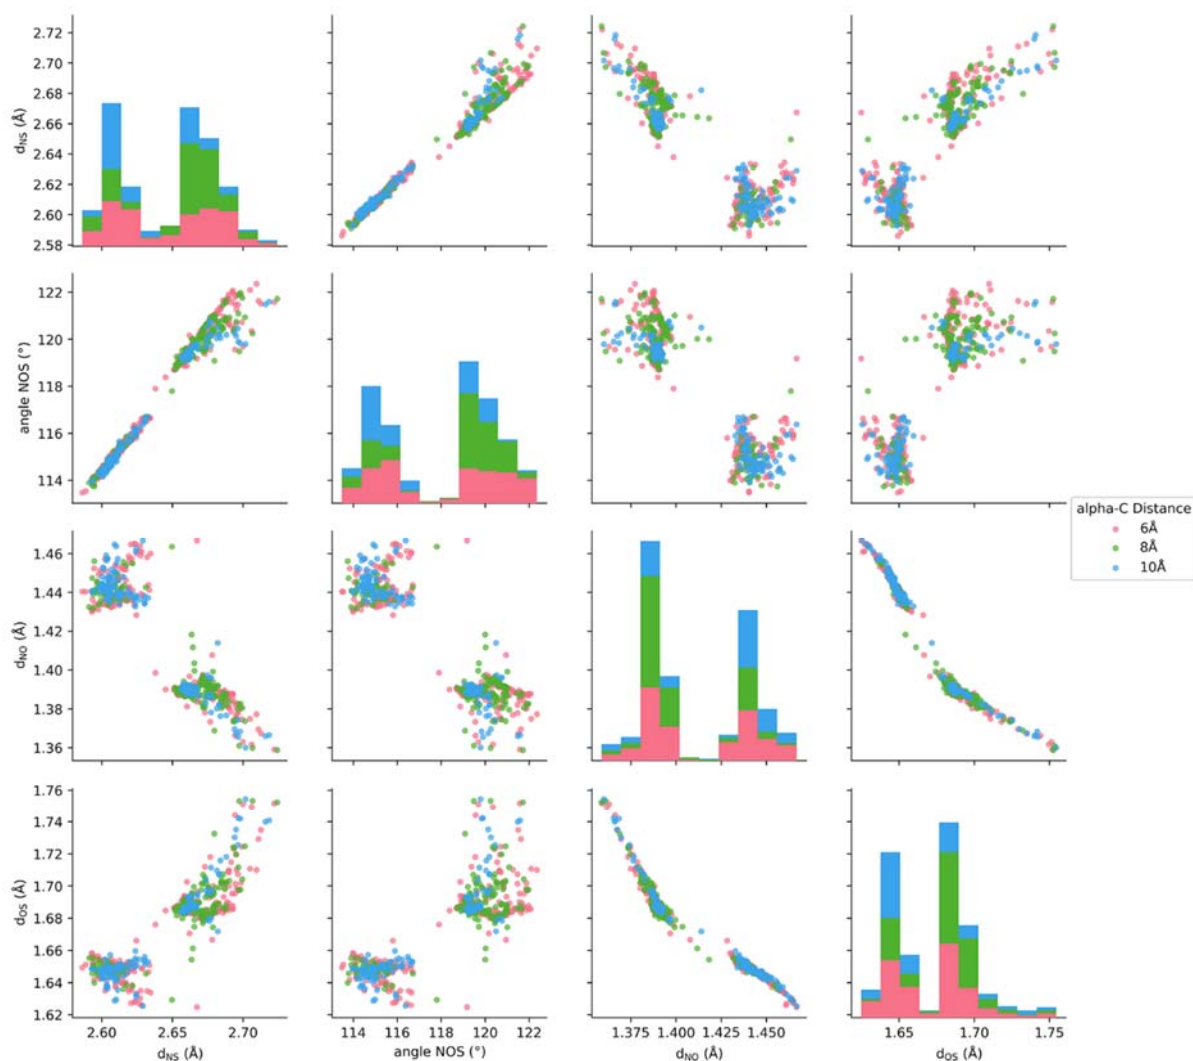

**Supplementary Fig. 2.** Geometric properties of NOS bridges. Pair plots for four selected structural variables of the NOS bond: N-S distance ( $d_{NS}$ ), NOS angle (Angle N-O-S), N-O distance ( $d_{NO}$ ) and O-S distance ( $d_{OS}$ ). The data used corresponds to the larger set of structures obtained with the def2-SVP basis set (the same as panels a and b). Several variables correlate strongly. The bimodal distribution of the N-S distances is due to steric constraints between the sulfur atom and the lysine chain, with an interplay between the N-O and the O-S bond distances. The N-O-S angle, as it should be expected, strongly correlates with the N-S distance. The results are largely independent of the distance between the  $\alpha$ -carbons of the two chains.

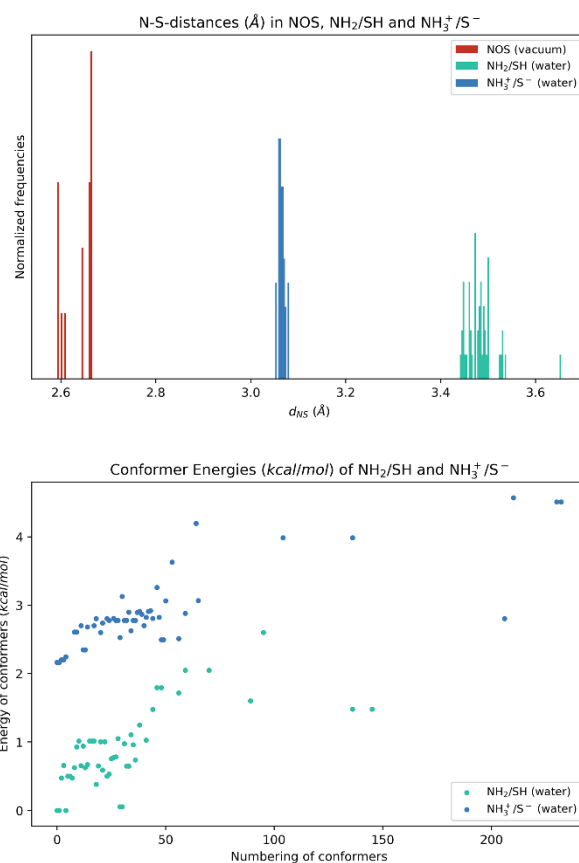

**Supplementary Fig. 3.** Top: histogram of N-S distances (normalised for each set individually), from model calculations on isolated Lysine and Cysteine residues (alpha-carbon distance of 8 Å). The data includes the NOS data (just as listed in Supplementary Fig. 1) adding the two tautomers for Lys(NH<sub>2</sub>)/Cys(SH) and Lys(NH<sub>3</sub><sup>+</sup>)/Cys(S<sup>-</sup>), the latter data obtained with the use of the SMD continuum model with water as solvent. The geometries were optimised at the B3LYP-D3(BJ)/def2-TZVPP level of theory. Bottom: relative energy differences for the two non-covalent bonded sets, showing that the most stable structures are in the combination Lys(NH<sub>2</sub>)/Cys(SH) (about 2 kcal/mol lower), even with such a high dielectric constant. The Lys(NH<sub>3</sub><sup>+</sup>)/Cys(S<sup>-</sup>) minima are not obtained for the models in vacuum.

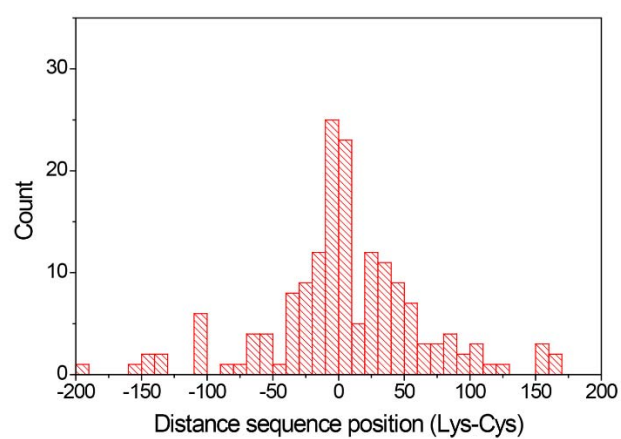

**Supplementary Fig. 4.** Histogram showing the distribution of detected proteins (non-redundant counts) containing lysine-cysteine crosslinks in dependence from the distance in sequence between the lysine and cysteine residues.



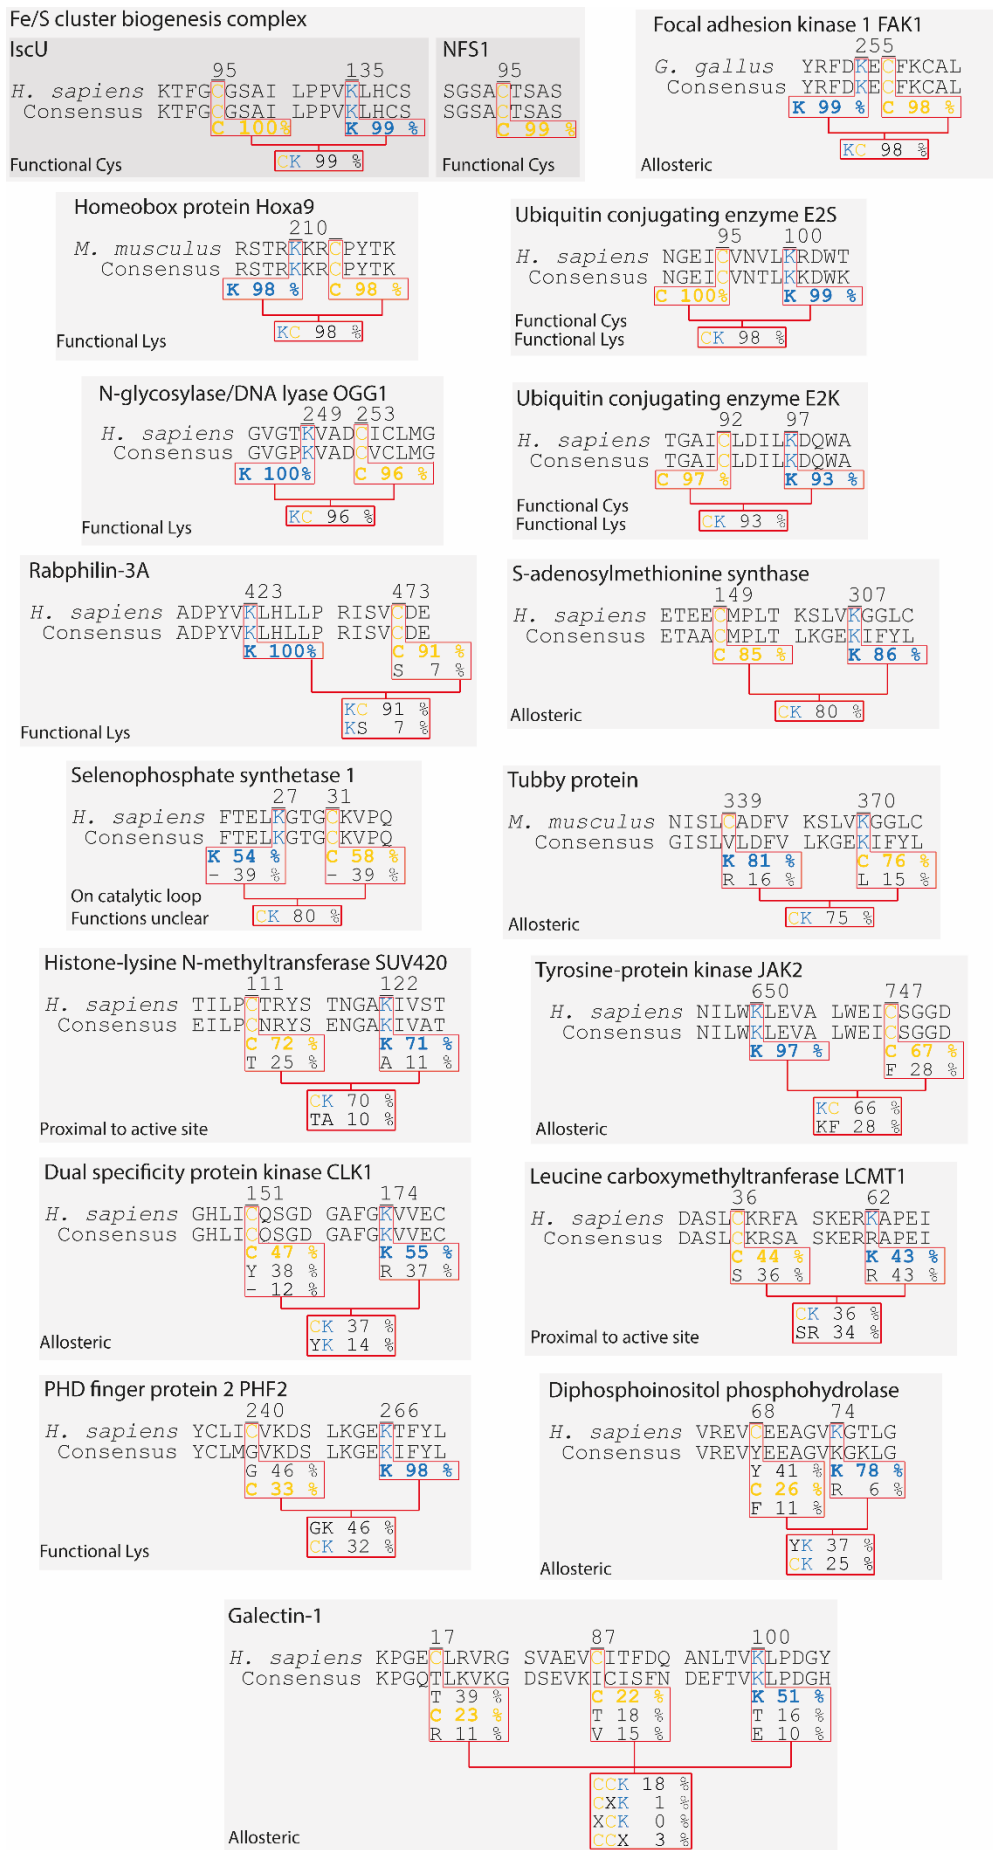

**Supplementary Fig. 5.** Sequence conservation of NOS bridge residues identified in human proteins or from model organisms.

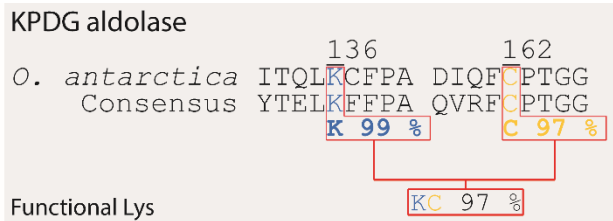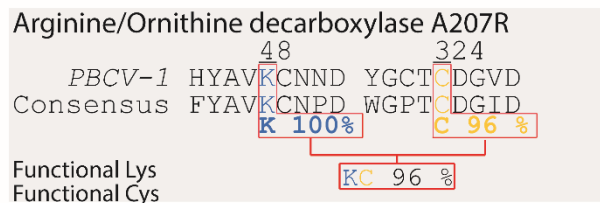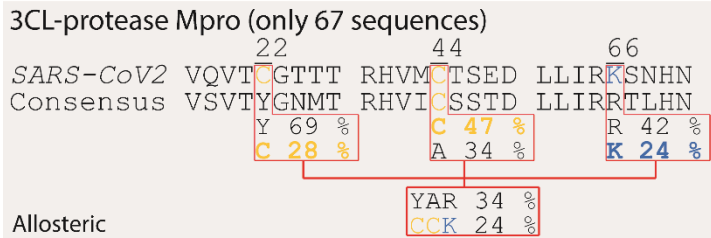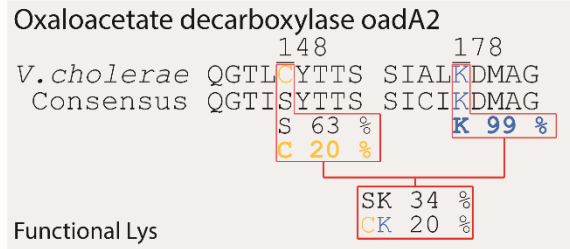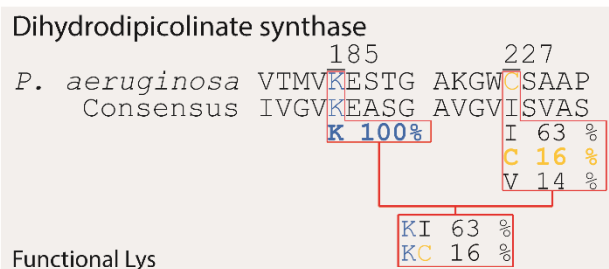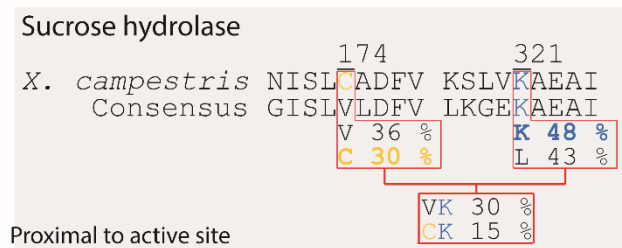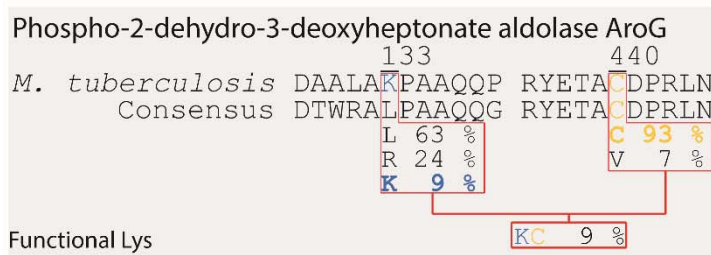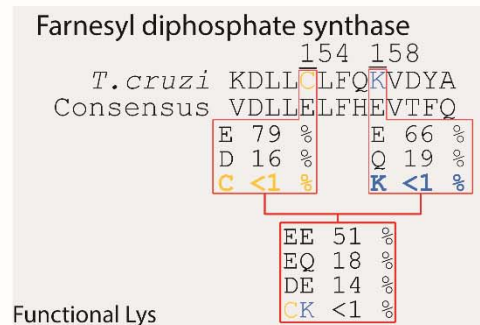

**Supplementary Fig. 6.** Sequence conservation of NOS bridge residues identified in proteins from pathogens.

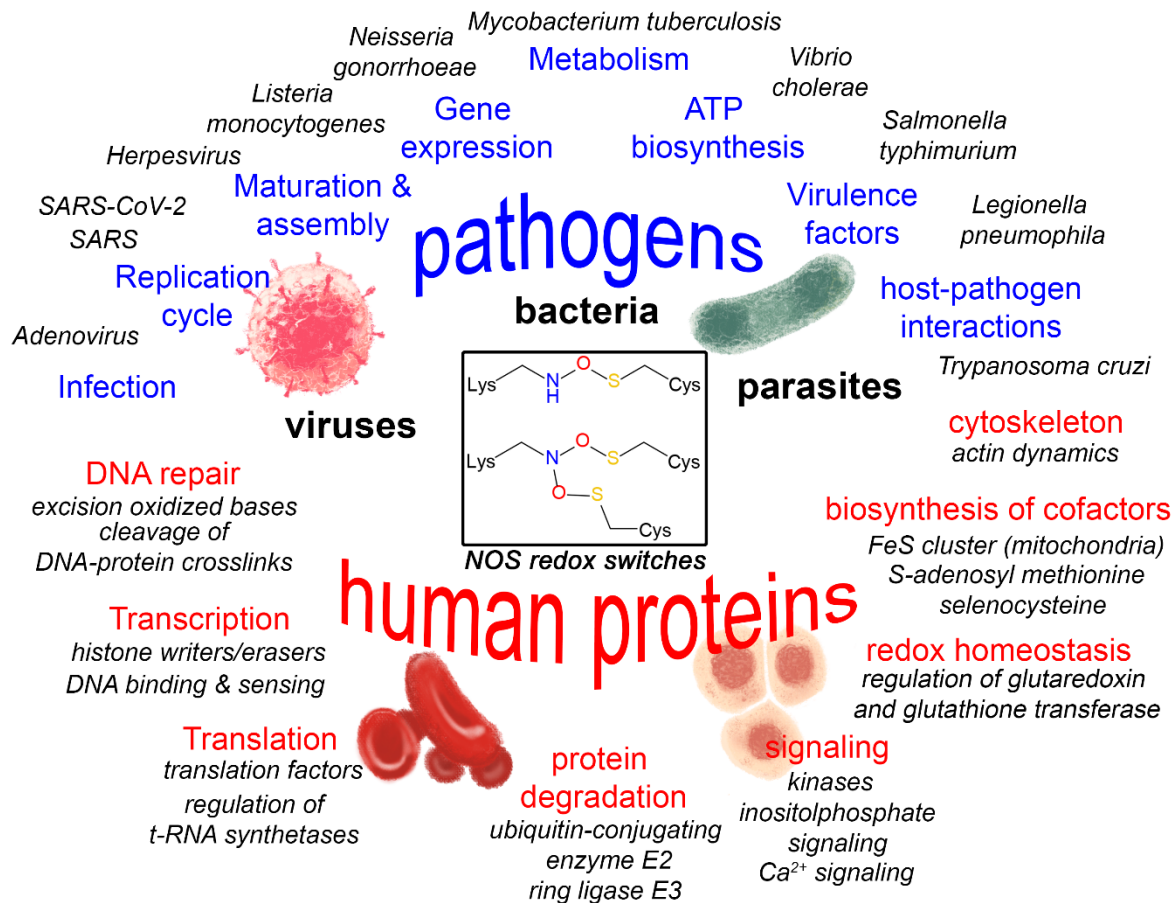

**Supplementary Fig. 7.** Occurrence and biological functions of proteins containing NOS and SONOS redox switches. Functions of proteins originating from human and plant pathogen are highlighted in blue color, representative examples of relevant species are shown alongside. Cellular functions of human proteins are highlighted in red color, functional subclasses and representative protein families are listed below. Specific information about all proteins regarding origin, biological function, type of NOS/SONOS redox switch, suggested mechanism of the redox switch and potential relevance in disease states is compiled in Supplementary Tables 2 & 3.

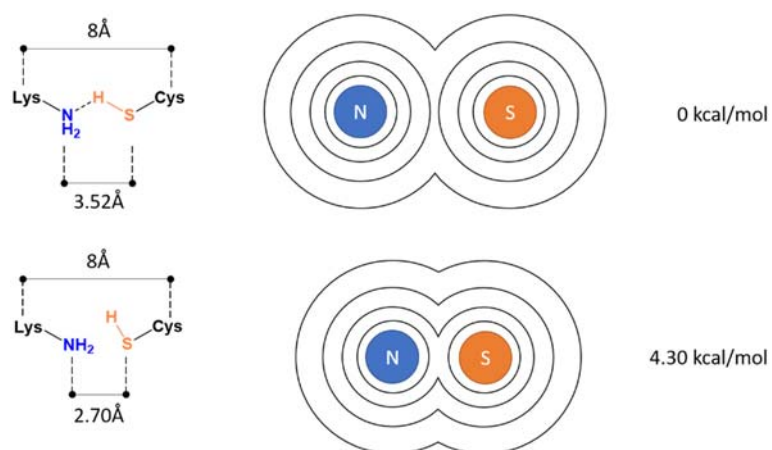

**Supplementary Fig. 8.** Energy penalty for the constrained N-S-distance of 2.7 Å in NHS (H-bond interaction). Top: electronic energy of the lowest conformer of NHS without the constraint. Bottom: lowest energy conformer of NHS with a constrained N-S distance of 2.7 Å. The electronic energy of the non-constrained conformer is taken as reference.

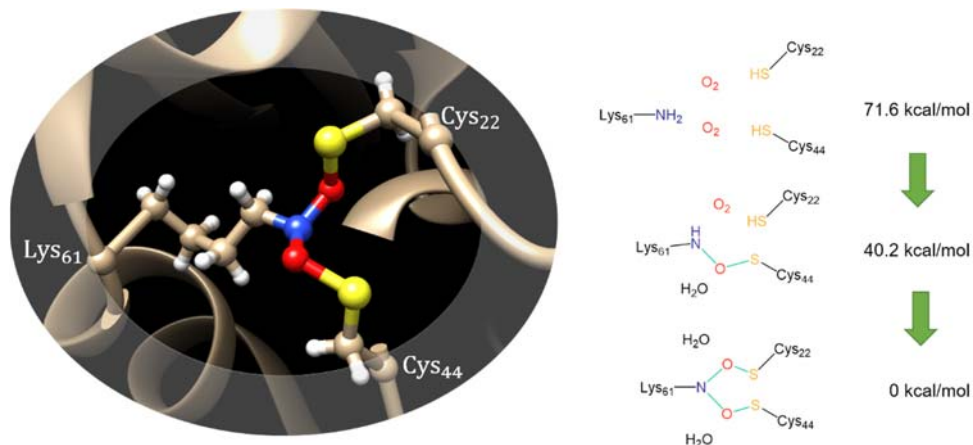

**Supplementary Fig. 9.** Summary of the thermochemistry in SONOS bond formation using a cluster model of the COVID-19 main protease SONOS site. The calculations were based on the reduced cluster from COVID-19 main protease (PDB code: 7JR4, rebuilt without covalent NOS or SONOS bridge), a structure including only the Cys22, Cys44 and Lys61 residues and truncating the  $\alpha$ -carbons (as terminal methyl groups) was taken for the calculation. The starting material contained additionally two oxygen molecules, which were turned into the two NOS linkages and water molecules via two steps. The structures were optimised using B3LYP-D3(BJ)/def2-SVPD to obtain the free energy corrections under standard state conditions ( $T=298.15$  K). The electronic energies were refined using B3LYP-D3(BJ)/def2-TZVPD. Calculations at both levels were carried out with the Gaussian16-A.03 program package under the application of the SMD solvation model (water as solvent). The most thermodynamically stable structure (the SONOS linked cluster) was taken as reference for the energies.

# Supplementary Tables

**Supplementary Table 1.** X-ray crystallographic data collection and refinement statistics.

|                                    | <i>NgTAL</i><br>E93Q            | <i>NgTAL</i> wt<br>0.27 MGy   | <i>NgTAL</i> wt<br>2.7 MGy    | <i>NgTAL</i> wt<br>5.4 MGy   |
|------------------------------------|---------------------------------|-------------------------------|-------------------------------|------------------------------|
|                                    | 7OEY                            | 7ODO                          | 7ODP                          | 7ODQ                         |
| <b>Data collection</b>             |                                 |                               |                               |                              |
| Space group                        | C 1 2 1                         | P 21 21 21                    | P 21 21 21                    | P 21 21 21                   |
| Cell dimensions                    |                                 |                               |                               |                              |
| <i>a, b, c</i> (Å)                 | 172.4 55.04<br>84.37            | 42.14 82.78<br>89.36          | 42.17 82.82<br>89.4           | 42.2 82.85<br>89.42          |
| $\alpha, \beta, \gamma$ (°)        | 90 108.7 90                     | 90 90 90                      | 90 90 90                      | 90 90 90                     |
| Resolution (Å)                     | 38.44 - 1.35<br>(1.398 - 1.35)* | 37.55 - 1.40<br>(1.45 - 1.40) | 38.14 - 1.40<br>(1.45 - 1.40) | 37.6 - 1.40<br>(1.45 - 1.40) |
| $R_{\text{meas}}$                  | 0.065 (0.865)                   | 0.090 (1.13)                  | 0.099(1.572)                  | 0.112 (2.416)                |
| $CC_{1/2}$                         | 0.998 (0.856)                   | 0.999 (0.856)                 | 0.999 (0.75)                  | 0.999 (0.568)                |
| $I/\sigma$                         | 12.67 (1.98)                    | 17.92 (2.41)                  | 16.10 (1.72)                  | 13.85 (1.08)                 |
| Completeness (%)                   | 97.80 (97.94)                   | 99.16 (98.07)                 | 99.11 (97.97)                 | 99.08 (97.93)                |
| Multiplicity                       | 4.6 (4.7)                       | 13.4 (13.4)                   | 13.4 (13.4)                   | 13.5 (13.4)                  |
| Wilson-B (Å <sup>2</sup> )         | 16.0                            | 13.5                          | 14.2                          | 15.1                         |
| <b>Refinement</b>                  |                                 |                               |                               |                              |
| Reflections used in refinement     | 160763 (16009)                  | 61847 (6047)                  | 61901 (6040)                  | 61970 (6042)                 |
| $R_{\text{work}}/R_{\text{free}}$  | 13.7/16.2                       | 13.9/16.2                     | 14.2/16.6                     | 14.8/17.2                    |
| Number of non-hydrogen atoms       |                                 |                               |                               |                              |
| macromolecules                     | 5845                            | 2936                          | 2936                          | 2936                         |
| ligands                            | 35                              | 13                            | 13                            | 13                           |
| solvent                            | 982                             | 434                           | 434                           | 434                          |
| Average B-factor (Å <sup>2</sup> ) |                                 |                               |                               |                              |
| macromolecules                     | 22.11                           | 17.43                         | 18.91                         | 20.61                        |
| ligands                            | 39.37                           | 22.08                         | 24.75                         | 28.94                        |
| solvent                            | 35.06                           | 29.25                         | 31.63                         | 33.85                        |
| R.m.s deviations                   |                                 |                               |                               |                              |
| RMS(bonds)                         | 0.012                           | 0.006                         | 0.006                         | 0.007                        |
| RMS(angles)                        | 1.19                            | 0.93                          | 0.97                          | 1.01                         |

\* Values in parentheses are for the highest-resolution shell.

| Organism/species                           | Protein                                        | Function                              | Redox switch                                                               | Mechanism                                | Disease/comments                              |
|--------------------------------------------|------------------------------------------------|---------------------------------------|----------------------------------------------------------------------------|------------------------------------------|-----------------------------------------------|
| <b>Human Pathogens</b>                     |                                                |                                       |                                                                            |                                          |                                               |
| <b>Viruses</b>                             |                                                |                                       |                                                                            |                                          |                                               |
| SARS-CoV-2                                 | Main protease (Mpro)                           | Polyprotein processing                | NOS (K61-C22)<br><b>pdb 6XMK</b><br>SONOS (C44-K61-C22)<br><b>pdb 7JR4</b> | allosteric<br>mobile Cys (C44)           | COVID-19                                      |
| SARS-CoV                                   | Main protease (Mpro)                           | Polyprotein processing                | NOS (K61-C22)<br><b>pdb 3SND</b>                                           | allosteric                               | SARS                                          |
| Human adenovirus                           | Fiber protein                                  | Binding to host receptor              | NOS (K295-C333)<br><b>pdb 1UXB</b>                                         | allosteric                               | Adenoviral keratoconjunctivitis               |
| Human cytomegalovirus                      | Nuclear egress complex pUL50                   | Virus maturation and assembly         | NOS (K132-C54)<br><b>pdb 6T3X</b>                                          | allosteric                               | HCMV infection (herpes)                       |
| <b>Bacteria</b>                            |                                                |                                       |                                                                            |                                          |                                               |
| <i>Neisseria gonorrhoeae</i>               | transaldolase                                  | Sugar metabolism                      | NOS (K8-C38)<br><b>pdb 6ZX4</b>                                            | allosteric                               | Gonorrhoea                                    |
| <i>Neisseria meningitidis</i>              | transaldolase                                  | Sugar metabolism                      | NOS (K8-C38)<br>Sequence homology                                          | allosteric                               | Bacterial meningitis and septicemia           |
| <i>Vibrio cholerae</i>                     | Oxaloacetate decarboxylase                     | Na <sup>+</sup> pump/ATP biosynthesis | NOS (K178-C148)<br><b>pdb 2NX9</b>                                         | Catalytic Lys (CO <sub>2</sub> transfer) | Cholera                                       |
| <i>Staphylococcus aureus</i>               | Pyruvate carboxylase                           | Gluconeogenesis                       | NOS (K741-C705)<br>Structural homology<br><b>pdb 3HO8</b>                  | Catalytic Lys (CO <sub>2</sub> transfer) | Bacterial superinfection                      |
| <i>Listeria monocytogenes</i>              | Pyruvate carboxylase                           | Gluconeogenesis                       | NOS (K710-C674)<br>Structural homology<br><b>pdb 4QSK</b>                  | Catalytic Lys (CO <sub>2</sub> transfer) | Listeriosis                                   |
| <i>Listeria monocytogenes</i>              | Transcriptional regulator PrfA                 | Regulation gene expression            | NOS (K163-C205)<br><b>pdb 6EUT</b>                                         | allosteric                               | Listeriosis                                   |
| <i>Mycobacterium tuberculosis</i>          | DAHPS synthase (DAHPS)                         | Amino acid metabolism                 | NOS (K133-C440)<br><b>pdb 3RZI</b>                                         | substrate binding                        | Tuberculosis                                  |
| <i>Pseudomonas aeruginosa</i>              | DAHPS synthase (DAHPS)                         | Amino acid metabolism                 | NOS (K115-C423)<br>Structural homology<br><b>pdb 5UXN</b>                  | substrate binding                        | Pneumonia                                     |
| <i>Ruminococcus gnavus</i>                 | Metal binding protein                          | unknown                               | NOS (K128-C100)<br><b>pdb 3U7Z</b>                                         | allosteric                               | Crohn's disease                               |
| <i>Pseudomonas aeruginosa</i>              | Dihydrodipicolinate synthase (putative)        | Lysine biosynthesis                   | NOS (K185-C227)<br><b>pdb 3NA8</b>                                         | catalytic Lys (Schiff base)              | Pneumonia                                     |
| <i>Acinetobacter sp. DL-28</i>             | L-ribose isomerase                             | Sugar metabolism                      | NOS (K93-C91)<br><b>pdb 4Q0P</b>                                           | substrate binding (Lys)                  | Nosocomial infections, pneumonia              |
| <i>Salmonella typhimurium</i>              | Multidrug resistance regulator RamR            | Regulation gene expression            | NOS (K63-C67)<br><b>pdb 6IE9</b>                                           | allosteric                               | Gastroenteritis, typhoid fever                |
| <i>Legionella pneumophila</i>              | Effector MavC                                  | Inactivation of human Ub system       | NOS (K320-C314)<br><b>pdb 6ULH</b>                                         | Proximal to trans-glutaminase site       | Legionnaires' disease                         |
| <i>Streptomyces sp. K15</i>                | DD-transpeptidase (penicillin binding protein) | Cell wall biosynthesis                | NOS (K38-C98)<br><b>pdb 1SKF</b>                                           | catalytic Lys (acid-base)                | target protein of $\beta$ -lactam antibiotics |
| <b>Parasites</b>                           |                                                |                                       |                                                                            |                                          |                                               |
| <i>Trypanosoma cruzi</i>                   | Farnesyl diphosphate synthase                  | Isoprenoid biosynthesis               | NOS (K158-C154)<br><b>pdb 6SDP</b>                                         | allosteric                               | Chagas disease                                |
| <i>Trypanosoma brucei</i>                  | Ornithine decarboxylase                        | Polyamine biosynthesis                | NOS (K69-C360)<br>Structural homology<br><b>pdb 1F3T</b>                   | Catalytic Lys Schiff-base PLP            | African sleeping sickness                     |
| <b>Plant pathogens</b>                     |                                                |                                       |                                                                            |                                          |                                               |
| <b>Viruses</b>                             |                                                |                                       |                                                                            |                                          |                                               |
| <i>Paramecium bursaria Chlorella Virus</i> | Arginine decarboxylase                         | Polyamine biosynthesis                | NOS (K48-C324)<br><b>pdb 2NV9</b>                                          | Catalytic Lys Schiff-base PLP            | Infection of algae, cell lysis and death      |
| <b>Bacteria</b>                            |                                                |                                       |                                                                            |                                          |                                               |
| <i>Xanthomonas campestris</i>              | Sucrose hydrolase                              | Sugar metabolism                      | NOS (K321-C174)<br><b>pdb 2WPG</b>                                         | Proximal to active site                  | "Black rot" in cruciferous vegetables         |
| <i>Xanthomonas axonopodis</i>              | Sucrose hydrolase                              | Sugar metabolism                      | NOS (K320-C173)<br><b>pdb 3CZG</b>                                         | Proximal to active site                  | Bacterial pustule of soybean                  |

**Supplementary Table 2.** NOS/SONOS bridges in proteins from human and plant pathogens. Information is provided for the protein identity, the origin of the protein, the biological function of the protein, the detected switch type (NOS or SONOS) with residues involved and relevant pdb codes, the suggested mechanism of the redox switch and relevant diseases associated with the identified species. Proteins identified based on structural homology are highlighted in gray shading. The complete list of all proteins with detected NOS bridges is provided in Supplementary Data 1.



| Organism                                                              | Protein                                                             | Function                                                                  | Redox switch                                                                 | Mechanism                                                            | Disease/comments                                                                                                |
|-----------------------------------------------------------------------|---------------------------------------------------------------------|---------------------------------------------------------------------------|------------------------------------------------------------------------------|----------------------------------------------------------------------|-----------------------------------------------------------------------------------------------------------------|
| <b>DNA repair</b>                                                     |                                                                     |                                                                           |                                                                              |                                                                      |                                                                                                                 |
| <i>Homo sapiens</i>                                                   | OGG1                                                                | DNA repair (excision 8-oxo-dG)                                            | NOS (K249-C253)<br><b>pdb 1M3Q</b>                                           | Catalytic Lys (Schiff-base)                                          | Various cancers                                                                                                 |
| <i>Homo sapiens</i>                                                   | Metalloprotease Spartan                                             | DNA repair (cleavage of DNA-protein crosslinks)                           | NOS (K184-C75)<br><b>pdb 6MDW</b>                                            | Proximal to active site                                              | Ruijs–Aalfs syndrome (premature aging and cancer)                                                               |
| <b>Protein biosynthesis and degradation</b>                           |                                                                     |                                                                           |                                                                              |                                                                      |                                                                                                                 |
| <i>Homo sapiens</i>                                                   | Density regulated protein                                           | Regulation of translation on ribosome                                     | NOS (K125-C154)<br><b>pdb 6VPQ</b>                                           | Lys on functional loop ('basic loop')                                | Asperger syndrome                                                                                               |
| <i>Homo sapiens</i>                                                   | Lysine methyltransferase METTL21C                                   | Methylation of alanine tRNA synthetase                                    | NOS (K76-C160)<br><b>pdb 4MTL</b>                                            | allosteric                                                           | Cancer (conjunction with MCTS1)<br>Chromosome 4q21 Deletion Syndrome<br>Inclusion body myositis<br>Osteoporosis |
| <i>Homo sapiens</i>                                                   | Ubiquitin-conjugating enzyme E2-25kDa                               | ubiquitin-dependent protein degradation                                   | NOS (K97-C92)<br><b>pdb 3E46</b>                                             | Catalytic Cys (Catalytic Lys)                                        | Alzheimer's disease<br>Huntington disease                                                                       |
| <i>Homo sapiens</i>                                                   | Ubiquitin-conjugating enzyme E2 S                                   | ubiquitin-dependent protein degradation (mitosis, meiosis)                | NOS (K100-C95)<br><b>pdb 6QHK</b>                                            | Catalytic Cys (Catalytic Lys)                                        | Various cancers                                                                                                 |
| <i>Homo sapiens</i>                                                   | Ubiquitin-conjugating enzyme E2 D2 E3 ligase RNF38                  | ubiquitin-dependent protein degradation                                   | NOS (K8 <sup>E2</sup> -C418 <sup>E3</sup> )<br>Interchain<br><b>pdb 4V3L</b> | Proximal to Zn <sup>2+</sup> cluster of E3                           | Various cancers                                                                                                 |
| <b>Transcription regulation</b>                                       |                                                                     |                                                                           |                                                                              |                                                                      |                                                                                                                 |
| <i>Mus musculus (conserved in human)</i>                              | Tubby protein                                                       | Transcription regulation, signaling                                       | NOS (K339-C370)<br><b>pdb 1I7E</b>                                           | allosteric                                                           | Maturity-onset obesity<br>Retinal dystrophy                                                                     |
| <i>Mus musculus (conserved in human)</i>                              | Homeobox protein Hox-A9                                             | Transcription regulation (cell fate & embryonic patterning)               | NOS (K207-C210)<br><b>pdb 1PUF</b>                                           | DNA Binding (Lys)                                                    | Acute myeloid leukemia                                                                                          |
| <i>Homo sapiens</i>                                                   | PHD finger protein 2                                                | Transcription regulation<br>Histone demethylation                         | NOS (K266-C240)<br><b>pdb 3PU8</b>                                           | Substrate binding (Lys) (α-ketoglutarate)                            | Culler-Jones syndrome, cancer<br>Autism Spectrum Disorder                                                       |
| <i>Homo sapiens</i>                                                   | Histone-lysine N-methyltransferase SUV420H2                         | Transcription regulation<br>Histone methylation                           | NOS (K122-C111)<br><b>pdb 3RQ4</b>                                           | Proximal to substrate binding site (SAM)                             | Various cancers                                                                                                 |
| <i>Mus musculus (conserved in humans)</i>                             | Interferon gamma-inducible protein 16                               | dsDNA sensing, innate immune response                                     | NOS (K267-C390)<br><b>pdb 5YZP</b>                                           | allosteric                                                           | Autoimmune disorders as e.g. primary Sjögren's syndrome (pSS), Cancer                                           |
| <b>Signaling</b>                                                      |                                                                     |                                                                           |                                                                              |                                                                      |                                                                                                                 |
| <i>Rattus norvegicus (conserved in humans)</i>                        | Galectin-1                                                          | Signaling, regulation of cell growth and differentiation, immune response | SONOS (C17-K100-C89)<br><b>pdb 4GA9</b>                                      | allosteric                                                           | Various cancers, inflammation, allergies                                                                        |
| <i>Homo sapiens</i>                                                   | Hematopoietic cell receptor CD69                                    | Lymphoid activation, signaling                                            | NOS (K146-C173)<br><b>pdb 1E8I</b>                                           | unknown                                                              | Inflammatory diseases (e.g. inflammatory bowel disease)                                                         |
| <i>Homo sapiens</i>                                                   | Tyrosine-protein kinase JAK2, pseudokinase domain                   | Signaling, tyrosine phosphorylation                                       | NOS (K650-C747)<br><b>pdb 4FVQ</b>                                           | allosteric                                                           | Bone marrow diseases (Myeloproliferative neoplasms, leukemia)                                                   |
| <i>Gallus gallus (conserved in humans)</i>                            | Focal adhesion kinase 1                                             | Signaling, regulation cell migration and motility                         | NOS (K255-C257)<br><b>pdb 6CBO</b>                                           | allosteric                                                           | Various cancers                                                                                                 |
| <i>Homo sapiens</i>                                                   | Casein kinase I isoform delta                                       | Ser/Thr kinase<br>Signaling in cell division, apoptosis, inflammation     | NOS (K57-C71)<br><b>pdb 6F1W</b>                                             | Proximal to ATP binding site                                         | Various cancers<br>Alzheimer's disease<br>Parkinson's disease                                                   |
| <i>Homo sapiens</i>                                                   | Dual specificity protein kinase CLK1                                | Regulation RNA splicing                                                   | NOS (K174-C151)<br><b>pdb 6FT9</b>                                           | allosteric                                                           | Various cancers<br>Alzheimer's disease                                                                          |
| <i>Homo sapiens</i>                                                   | Casein kinase gamma 3                                               | Signaling (Ser/Thr kinase)                                                | NOS (K48-C51)<br><b>pdb 2IZU</b>                                             | allosteric                                                           | Various cancers<br>Fibrosis                                                                                     |
| <i>Homo sapiens</i>                                                   | TBC1 domain family member 7                                         | Signaling (GTPase activation), regulation cell growth & differentiation   | NOS (K233-C286)<br><b>pdb 3QWL</b>                                           | Ligand binding (metal ion)                                           | Macrocephaly/mega-lencephaly syndrome<br>Tuberous sclerosis                                                     |
| <i>Homo sapiens</i>                                                   | Leucine carboxylmethyltransferase-1                                 | Signaling, Regulation PP2A activity                                       | NOS (K62-C36)<br><b>pdb 3IEI</b>                                             | Proximal to substrate SAM                                            | Alzheimer's disease                                                                                             |
| <i>Rattus norvegicus (conserved in humans)</i>                        | Rabphilin-3A                                                        | Regulation of exo- and endocytosis (neurotransmission)                    | NOS (K423-C473)<br><b>pdb 4NP9</b>                                           | Effector IP3 binding (Lys) proximal to Ca <sup>2+</sup> binding site | Levodopa-induced dyskinesias, Martsolf Syndrome (MARTS)                                                         |
| <i>Doryteuthis pealeii</i>                                            | Calexcitin                                                          | Signaling in learning and memory, regulation K <sup>+</sup> channels      | NOS (K41-C24)<br><b>pdb 2CCM</b>                                             | proximal to Ca <sup>2+</sup> binding site                            | Alzheimer's disease                                                                                             |
| <i>Homo sapiens</i>                                                   | diphosphoinositol phosphohydrolase 1                                | Regulation of inositol diphosphate signaling                              | NOS (K74-C68)<br><b>pdb 6PCK</b>                                             | allosteric                                                           | Renal dysplasia, cerebellar hypoblasia                                                                          |
| <b>Biosynthesis sulphur-containing cofactors and rare amino acids</b> |                                                                     |                                                                           |                                                                              |                                                                      |                                                                                                                 |
| <i>Homo sapiens</i>                                                   | iron-sulfur cluster assembly enzyme ISCU2                           | Iron-sulfur cluster biogenesis                                            | NOS (K135-C95)<br><b>pdb 6UXE</b>                                            | Catalytic Cys (C95)                                                  | Mitochondrial myopathy<br>Friedreich's ataxia (FRDA)<br>Sideroblastic anemia                                    |
| <i>Homo sapiens</i>                                                   | Cysteine desulfurase NFS1 iron-sulfur cluster assembly enzyme ISCU2 | Iron-sulfur cluster biogenesis                                            | SONOS (C381-K135-C95)<br>Interchain<br><b>pdb 6W12</b>                       | Catalytic Cys (C381, C95)<br>Mobile Cys (C381)                       | Mitochondrial myopathy<br>Friedreich's ataxia (FRDA)<br>Sideroblastic anemia                                    |
| <i>Homo sapiens</i>                                                   | S-adenosylmethionine synthase isoform type-2                        | S-Adenosylmethionine biosynthesis                                         | NOS (K307-C149)<br><b>pdb 6FBP</b>                                           | allosteric                                                           | Familial Thoracic Aortic Aneurysm and Aortic Dissection (FAA)<br>Various cancers                                |
| <i>Homo sapiens</i>                                                   | Selenophosphate synthetase 1                                        | Redox homeostasis, selenium salvage pathway                               | NOS (K27-C31)<br><b>pdb 3FD5</b>                                             | On catalytic loop                                                    | Ivic Syndrome<br>Ischiocoxopodopatellar Syndrome                                                                |
| <i>Homo sapiens</i>                                                   | Selenophosphate synthetase 2                                        | Selenocysteine/selenoprotein biosynthesis                                 | NOS (K58-C62)<br>sequence homology                                           | On catalytic loop                                                    | Keshan Disease<br>Ischiocoxopodopatellar Syndrome                                                               |
| <b>Cytoskeleton</b>                                                   |                                                                     |                                                                           |                                                                              |                                                                      |                                                                                                                 |
| <i>Gallus gallus (conserved in human)</i>                             | Actin capping protein alpha 1                                       | Regulation of actin filament dynamics                                     | NOS (K135-C147)<br><b>pdb 3AA1</b>                                           | allosteric                                                           | Degenerative diseases<br>cancer                                                                                 |
| <i>Mus musculus (conserved in human)</i>                              | Profilin-2                                                          | Microfilament nucleation and polymerisation                               | NOS (K126-C16)<br><b>pdb 2V8F</b>                                            | Proximal to ligand binding site                                      | Neurological and behavioural diseases                                                                           |

**Supplementary Table 3.** Human proteins (or from animal models) with NOS bridges classified according to their cellular function. Information is provided for the protein identity, the origin of the protein, the

biological function of the protein, the detected switch type (NOS or SONOS) with residues involved and relevant pdb codes, the suggested mechanism of the redox switch and relevant diseases associated with the identified species. Proteins identified based on sequence homology are highlighted in gray shading. In case the identified protein originates from an animal model system, a putative sequence conservation of the NOS residues in the human orthologue is indicated. The complete list of all proteins with detected NOS bridges is provided in Supplementary Data 1.

**Supplementary Table 4.** Steady-state kinetic analysis of NgTAL wild-type and variant Glu93Gln under oxidizing (w/o DTT) and reducing (w/ 1 mM DTT) conditions.

| Transaldolase                |              | $k_{\text{cat}}$<br>[s <sup>-1</sup> ] | $K_{\text{M}}$<br>[mM]       | $k_{\text{cat}}/K_{\text{M}}$<br>[s <sup>-1</sup> mM <sup>-1</sup> ] | DTT |
|------------------------------|--------------|----------------------------------------|------------------------------|----------------------------------------------------------------------|-----|
| <b><i>N. gonorrhoeae</i></b> |              |                                        |                              |                                                                      |     |
| wt ox                        | steady-state | 0.63 ± 0.02                            | 9.98 ± 1.28                  | 0.06                                                                 | -   |
|                              | basal        | (0.29 ± 0.01) <sup>a</sup>             | (9.36 ± 1.33) <sup>a</sup>   | (0.03)                                                               |     |
| wt red                       | steady-state | 17.63 ± 0.33<br>(30-fold ↗)            | 5.62 ± 0.41<br>(2-fold ↘)    | 3.14<br>(60-fold ↗)                                                  | +   |
| Glu93Gln ox                  | steady-state | 0.91 ± 0.03                            | 15.12 ± 1.58                 | 0.06                                                                 | -   |
|                              | basal        | (0.09 ± 0.01) <sup>a</sup>             | (6.89 ± 2.06) <sup>a</sup>   | (0.01)                                                               |     |
| Glu93Gln red                 | steady-state | 15.34 ± 0.24<br>(20-fold ↗)            | 10.79 ± 0.61<br>(1.5-fold ↘) | 1.42<br>(25-fold ↗)                                                  | +   |

Oxidizing conditions, without DTT; reducing conditions, with 1 mM DTT. We estimated  $k_{\text{cat}}$ , apparent  $K_{\text{M}}$  for the substrate D-fructose 6-phosphate (F6P) and catalytic efficiency ( $k_{\text{cat}}/K_{\text{M}}$ ) in a continuous spectrophotometric assay for the conversion of F6P + E4P → S7P + G3P as detailed in Methods section. In case of the oxidized, we observed a pronounced lag phase that suggested a catalytic activation under turnover conditions. We thus provide both the steady-state activities after full activation as well as basal activities at  $t = 0$  before activation sets in. The  $x$ -fold change for  $k_{\text{cat}}$  and  $K_{\text{M}}$  for the reduced enzyme relative to the oxidized form at steady state is indicated. All measurements were carried out in triplicate and are shown as mean ± s.d.

<sup>a</sup> In case of catalytic activation, progress curves were fitted with eq 1 as detailed in the Methods section.
